# Supplementary material
Source: PubMed Central journal article supplement (PMC4461459)
Supplement: NIHMS691148-supplement-1.pdf [file NIHMS691148-supplement-1.pdf]

# Cheerathodi *et al.* Supplementary Figure 1

|                 |                                                               |      |  |
|-----------------|---------------------------------------------------------------|------|--|
| Exon:           | 1↓2                                                           |      |  |
| Mm_C3G_isoform2 | MSSGLGRRSPMSGKIEKADSRSHLSSTMKLMDKFHSPKIKRTPSKKGGKPAEVSKI      | 59   |  |
| Mm_C3G_isoform3 | MSSGLGRRSPMSGKIEKADSRSHLSSTMKLMDKFHSPKIKRTPSKKGGKPAEVSKI      | 59   |  |
| Exon:           | 2↓3                                                           |      |  |
| Mm_C3G_isoform2 | PEKFSV-----KNCWLEEKEKEVVS                                     | 81   |  |
| Mm_C3G_isoform3 | PEKFSVKEARDRFLPEGYPPLDLEQQAVFMSTSAVASRSQRQKNCWLEEKEKEVVS      | 119  |  |
| Exon:           | 3↓4                                                           |      |  |
| Mm_C3G_isoform2 | LRYFKTIVDKMAIDKKVLEMLPGSASKVLEAILPLVQTDPRIQHSSALSSCYSRVYQSLA  | 141  |  |
| Mm_C3G_isoform3 | LRYFKTIVDKMAIDKKVLEMLPGSASKVLEAILPLVQTDPRIQHSSALSSCYSRVYQSLA  | 179  |  |
| Exon:           | 4↓5                                                           |      |  |
| Mm_C3G_isoform2 | NLIRWSDQVMLEGVNSEDKEMVTTVKGVIKAVLDGVKELVRLTIEKQGRPSPTSVVKFSS  | 201  |  |
| Mm_C3G_isoform3 | NLIRWSDQVMLEGVNSEDKEMVTTVKGVIKAVLDGVKELVRLTIEKQGRPSPTSVVKFSS  | 239  |  |
| Exon:           | 5↓6                                                           |      |  |
| Mm_C3G_isoform2 | PASKPDGQPELPLTDREMEILNKTTSVSPSAELLDPDSTSEEVAPPKPELPGIRVVDNSPP | 261  |  |
| Mm_C3G_isoform3 | PASKPDGQPELPLTDREMEILNKTTSVSPSAELLDPDSTSEEVAPPKPELPGIRVVDNSPP | 299  |  |
| Exon:           | 7↓8                                                           |      |  |
| Mm_C3G_isoform2 | ALPKKQRQAPSPTRVAVVAPMSRATSGSSLVPGINRQDFDVECYTQRRLSGGSRSCGGE   | 321  |  |
| Mm_C3G_isoform3 | ALPKKQRQAPSPTRVAVVAPMSRATSGSSLVPGINRQDFDVECYTQRRLSGGSRSCGGE   | 359  |  |
| Exon:           | 8↓9                                                           |      |  |
| Mm_C3G_isoform2 | SPRLSPCSSTGKLSRSDEQLSSLDLDRDSGQCSRNTSCETLDHYDDPYEFLQDLSNADQIP | 381  |  |
| Mm_C3G_isoform3 | SPRLSPCSSTGKLSRSDEQLSSLDLDRDSGQCSRNTSCETLDHYDDPYEFLQDLSNADQIP | 419  |  |
| Mm_C3G_isoform2 | PQAACNLSPLPESLGESEPPFLGHPFQLPLGSLCQQEGQQTDTPALPKKRRSAVSQTT    | 441  |  |
| Mm_C3G_isoform3 | PQAACNLSPLPESLGESEPPFLGHPFQLPLGSLCQQEGQQTDTPALPKKRRSAVSQTT    | 479  |  |
| Mm_C3G_isoform2 | DSSGCRVSYERHPSQYDNISEGDLQNPVQVPPFAAVLFFQQGASSASAEFVGDFFS      | 501  |  |
| Mm_C3G_isoform3 | DSSGCRVSYERHPSQYDNISEGDLQNPVQVPPFAAVLFFQQGASSASAEFVGDFFS      | 539  |  |
| Exon:           | 9↓10                                                          |      |  |
| Mm_C3G_isoform2 | VPFLAGDTEKPELPEKKNKHMLAYMQLLEDYSEPPSMFYQTPQSEHIYQQKNKMLMEV    | 561  |  |
| Mm_C3G_isoform3 | VPFLAGDTEKPELPEKKNKHMLAYMQLLEDYSEPPSMFYQTPQSEHIYQQKNKMLMEV    | 599  |  |
| Exon:           | 10↓11                                                         |      |  |
| Mm_C3G_isoform2 | YGFSEFCGSDSTQELAPPALPKKQRQQLQASYAASSFSVYCVQQTVAFTPEDGSAAQ     | 621  |  |
| Mm_C3G_isoform3 | YGFSEFCGSDSTQELAPPALPKKQRQQLQASYAASSFSVYCVQQTVAFTPEDGSAAQ     | 628  |  |
| Exon:           | 11↓12                                                         |      |  |
| Mm_C3G_isoform2 | GLSVSVNSFLNRHGSGLPVPSYKSVFRYSQDFMPHHQASVQFLPPTSSSHFPPVHT      | 681  |  |
| Mm_C3G_isoform3 | -----                                                         | 628  |  |
| Exon:           | 12↓13                                                         |      |  |
| Mm_C3G_isoform2 | SQSSDLAVPTVSSPPSTVDGPLSSQDSSFHGNPVRPLPSETSF7DSSEKASSEAGGDE    | 741  |  |
| Mm_C3G_isoform3 | -----                                                         | 628  |  |
| Exon:           | 13↓14                                                         |      |  |
| Mm_C3G_isoform2 | YVSLYSSGQTSEELAPCRGEPSPGKDGHRDPSVSSASGKDSRENGERSPKSLDGLESAQ   | 801  |  |
| Mm_C3G_isoform3 | -----EPPSGKDGHRDPSVSSASGKDSRENGERSPKSLDGLESAQ                 | 669  |  |
| Exon:           | 15↓16                                                         |      |  |
| Mm_C3G_isoform2 | SEEEVDELSLIDHNEIMARLTLLKQEGDDGPDVRRGGSDILLVHATETDRKDLVLYCEAFL | 861  |  |
| Mm_C3G_isoform3 | SEEEVDELSLIDHNEIMARLTLLKQEGDDGPDVRRGGSDILLVHATETDRKDLVLYCEAFL | 729  |  |
| Exon:           | 17↓18                                                         |      |  |
| Mm_C3G_isoform2 | TTYRTFISPEELIKKLQYRYEKFSFPADTFKKRVSKNTFFVLRVVDELCLVELTEEILK   | 921  |  |
| Mm_C3G_isoform3 | TTYRTFISPEELIKKLQYRYEKFSFPADTFKKRVSKNTFFVLRVVDELCLVELTEEILK   | 789  |  |
| Exon:           | 19↓20                                                         |      |  |
| Mm_C3G_isoform2 | LLMELVFRVLCVSGELSLARVLRKNIIDKVDQKLLRCAHSDQPLAARGVAARPGTLHDFH  | 981  |  |
| Mm_C3G_isoform3 | LLMELVFRVLCVSGELSLARVLRKNIIDKVDQKLLRCAHSDQPLAARGVAARPGTLHDFH  | 849  |  |
| Exon:           | 20↓21                                                         |      |  |
| Mm_C3G_isoform2 | SHEIAEQTLTLLDAELFYKIEIPEVLLWAKEQNEEKSPNLTQFTEHFNNMSYWVRSIIMLQ | 1041 |  |
| Mm_C3G_isoform3 | SHEIAEQTLTLLDAELFYKIEIPEVLLWAKEQNEEKSPNLTQFTEHFNNMSYWVRSIIMLQ | 909  |  |
| Exon:           | 22↓23                                                         |      |  |
| Mm_C3G_isoform2 | EKAQDRERLLKFKIKIMKHLRKLNNFNLSYLAISALDSAPIRLEWQRQTSEGLAEYCTL   | 1101 |  |
| Mm_C3G_isoform3 | EKAQDRERLLKFKIKIMKHLRKLNNFNLSYLAISALDSAPIRLEWQRQTSEGLAEYCTL   | 969  |  |
| Exon:           | 24↓25                                                         |      |  |
| Mm_C3G_isoform2 | IDSSSFRAARAALSEVEPPCIPYLGILLQDLTFVHLGNPDYIDGKVNFSKRWQDFNILD   | 1161 |  |
| Mm_C3G_isoform3 | IDSSSFRAARAALSEVEPPCIPYLGILLQDLTFVHLGNPDYIDGKVNFSKRWQDFNILD   | 1029 |  |
| Exon:           | 25↓26                                                         |      |  |
| Mm_C3G_isoform2 | SMRCFQAQAHYEIRRNDDIINFNFDSHDLAEALWELSLKIKPRNITRRTKDREKKT      | 1218 |  |
| Mm_C3G_isoform3 | SMRCFQAQAHYEIRRNDDIINFNFDSHDLAEALWELSLKIKPRNITRRTKDREKKT      | 1086 |  |

Cadherin Binding Domain    
 EXXEXX (Crk/CrkL-SH3 Binding Motif)    
 █ Activating Phosphorylation Site  
Ras Family Exchanger Motif    
Ras Family GEF Domain

Alignment of the two most characterized proteins species variants of murine C3G (Rapgef1 isoform 2 and 3: [http://www.ncbi.nlm.nih.gov/gene?cmd=Retrieve&dopt=full\\_report&list\\_uids=107746](http://www.ncbi.nlm.nih.gov/gene?cmd=Retrieve&dopt=full_report&list_uids=107746)). Indicated are the functional domains and exon boundaries as presented in Figure 5.
